# Supplementary material for: Highly Sensitive Plasmonic Biosensors with Precise Phase Singularity Coupling on the Metastructures
Source: MDPI journal article supplement (doi:10.3390/bios12100866), 2022-10-12
Supplement: s1 [file s1]

## Supporting Information:

# Highly Sensitive Plasmonic Biosensors with Precise Phase Singularity Coupling on the Metastructures

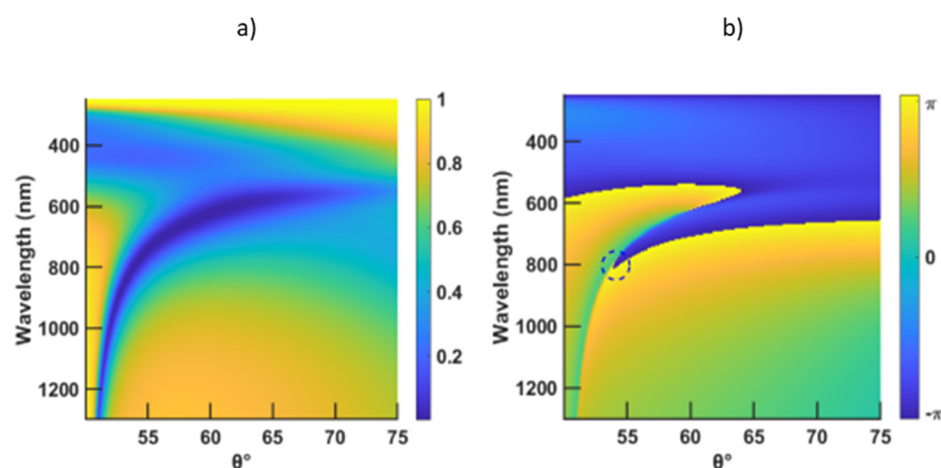

**Figure S1.** SPR curves: minimum reflectivity versus wavelength and incident angle, VO<sub>2</sub> at 20° with a thickness of 4 nm and a gold thickness of 46 nm; a) reflectivity and b) phase.

**Table S1.** Refractive index of VO<sub>2</sub> at 20 °C and 95 °C excited at 630 and 785 nm.

| $\lambda$<br>(nm) | 20 °C          | 95 °C           |
|-------------------|----------------|-----------------|
| 630               | 3.159 + 0.473i | 2.582 + 0.527i  |
| 785               | 3.022 + 0.489i | 2.0625 + 0.748i |

**Table S2.** Summary of the best results of VO<sub>2</sub> at 20 °C with an excitation of 630 nm, taking into consideration the gold and VO<sub>2</sub> thicknesses, minimum reflectivity, FWHM, GH shift, GH sensitivity for  $\Delta n = 0.02$ , angular sensitivity for  $\Delta n = 1.2 \times 10^{-6}$ , phase sensitivity for  $\Delta n = 1.2 \times 10^{-6}$ , and GH sensitivity for  $\Delta n = 1.2 \times 10^{-6}$ .

| Gold<br>(nm) | VO <sub>2</sub><br>(nm) | Reflectivity            | FWHM<br>(°) | GH<br>shift<br>(μm) | S <sub>GH</sub><br>(μm/RIU)<br>$\Delta n = 0.02$ | S <sub>A</sub><br>(°/RIU)<br>$\Delta n = 1.2 \times 10^{-6}$ | S <sub>P</sub><br>(°/RIU)<br>$\Delta n = 1.2 \times 10^{-6}$ | S <sub>GH</sub><br>(μm/RIU)<br>$\Delta n = 1.2 \times 10^{-6}$ |
|--------------|-------------------------|-------------------------|-------------|---------------------|--------------------------------------------------|--------------------------------------------------------------|--------------------------------------------------------------|----------------------------------------------------------------|
| 49           | -                       | $1.037 \times 10^{-04}$ | 2.808       | 94.02               | $3.418 \times 10^3$                              | 0                                                            | $1.183 \times 10^{11}$                                       | $9.736 \times 10^3$                                            |
| 46           | 4                       | $2.608 \times 10^{-05}$ | 4.753       | 86.01               | $3.691 \times 10^3$                              | 0                                                            | $1.164 \times 10^{11}$                                       | $3.743 \times 10^4$                                            |
| 47           | 3                       | $9.168 \times 10^{-05}$ | 4.208       | 54.08               | $1.432 \times 10^3$                              | 0                                                            | $7.269 \times 10^{10}$                                       | $2.391 \times 10^3$                                            |
| 48           | 1                       | $8.922 \times 10^{-05}$ | 3.221       | 82.65               | $3.098 \times 10^3$                              | 0                                                            | $1.062 \times 10^{11}$                                       | $2.037 \times 10^3$                                            |

**Table S3.** Summary of the best results of VO<sub>2</sub> at 95 °C with an excitation of 630 nm, taking into consideration the gold and VO<sub>2</sub> thicknesses, minimum reflectivity, FWHM, GH shift, GH sensitivity for  $\Delta n = 0.02$ , angular sensitivity for  $\Delta n = 1.2 \times 10^{-6}$ , phase sensitivity for  $\Delta n = 1.2 \times 10^{-6}$ , and GH sensitivity for  $\Delta n = 1.2 \times 10^{-6}$ .

| Gold (nm) | VO <sub>2</sub> (nm) | Reflectivity            | FWHM (°) | GH shift (μm)       | S <sub>GH</sub> (μm/RIU) $\Delta n = 0.02$ | S <sub>A</sub> (°/RIU) $\Delta n = 1.2 \times 10^{-6}$ | S <sub>P</sub> (°/RIU) $\Delta n = 1.2 \times 10^{-6}$ | S <sub>GH</sub> (μm/RIU) $\Delta n = 1.2 \times 10^{-6}$ |
|-----------|----------------------|-------------------------|----------|---------------------|--------------------------------------------|--------------------------------------------------------|--------------------------------------------------------|----------------------------------------------------------|
| 46        | 3                    | $3.057 \times 10^{-06}$ | 3.771    | $2.637 \times 10^2$ | $1.524 \times 10^4$                        | 74.000                                                 | $8.150 \times 10^4$                                    | $7.872 \times 10^5$                                      |
| 47        | 2                    | $1.281 \times 10^{-08}$ | 3.433    | $1.595 \times 10^3$ | $9.191 \times 10^4$                        | 73.000                                                 | $3.902 \times 10^4$                                    | $3.292 \times 10^7$                                      |
| 48        | 1                    | $7.328 \times 10^{-06}$ | 3.111    | $2.911 \times 10^2$ | $1.322 \times 10^4$                        | 72.765                                                 | $1.451 \times 10^4$                                    | $2.305 \times 10^5$                                      |

**Table S4.** Summary of the best results of VO<sub>2</sub> at 20 °C with an excitation of 785 nm, taking into consideration the gold and VO<sub>2</sub> thicknesses, minimum reflectivity, FWHM, GH shift, GH sensitivity for  $\Delta n = 0.02$ , angular sensitivity for  $\Delta n = 1.2 \times 10^{-6}$ , and GH sensitivity for  $\Delta n = 1.2 \times 10^{-6}$ .

| Gold (nm) | VO <sub>2</sub> (nm) | Reflectivity           | FWHM (°) | GH shift (μm)       | S <sub>GH</sub> (μm/RIU) $\Delta n = 0.02$ | S <sub>A</sub> (°/RIU) $\Delta n = 1.2 \times 10^{-6}$ | S <sub>GH</sub> (μm/RIU) $\Delta n = 1.2 \times 10^{-6}$ |
|-----------|----------------------|------------------------|----------|---------------------|--------------------------------------------|--------------------------------------------------------|----------------------------------------------------------|
| 50        | -                    | $1.351 \times 10^{-3}$ | 1.265    | $1.221 \times 10^2$ | $2.663 \times 10^3$                        | 62.763                                                 | $2.240 \times 10^5$                                      |
| 46        | 4                    | $8.239 \times 10^{-5}$ | 2.053    | $1.788 \times 10^2$ | $5.922 \times 10^3$                        | 67.764                                                 | $2.158 \times 10^4$                                      |
| 47        | 3                    | $2.572 \times 10^{-5}$ | 1.828    | $4.553 \times 10^2$ | $1.735 \times 10^4$                        | 66.513                                                 | $1.260 \times 10^6$                                      |
| 48        | 2                    | $1.539 \times 10^{-5}$ | 1.623    | $7.891 \times 10^2$ | $3.463 \times 10^4$                        | 65.263                                                 | $3.218 \times 10^5$                                      |

**Table S5.** Summary of the best results of VO<sub>2</sub> at 95 °C with an excitation of 785 nm, taking into consideration the gold and VO<sub>2</sub> thicknesses, minimum reflectivity, FWHM, GH shift, GH sensitivity for  $\Delta n = 0.02$ , angular sensitivity for  $\Delta n = 1.2 \times 10^{-6}$ , and GH sensitivity for  $\Delta n = 1.2 \times 10^{-6}$ .

| Gold (nm) | VO <sub>2</sub> (nm) | Reflectivity           | FWHM (°) | GH shift (μm)       | S <sub>GH</sub> (μm/RIU) $\Delta n = 0.02$ | S <sub>A</sub> (°/RIU) $\Delta n = 1.2 \times 10^{-6}$ | S <sub>GH</sub> (μm/RIU) $\Delta n = 1.2 \times 10^{-6}$ |
|-----------|----------------------|------------------------|----------|---------------------|--------------------------------------------|--------------------------------------------------------|----------------------------------------------------------|
| 46        | 2                    | $4.481 \times 10^{-5}$ | 1.523    | $3.130 \times 10^2$ | $1.183 \times 10^4$                        | 64.013                                                 | $4.224 \times 10^5$                                      |
| 47        | 1                    | $1.709 \times 10^{-3}$ | 1.398    | $4.444 \times 10^1$ | $1.692 \times 10^3$                        | 63.513                                                 | $8.369 \times 10^3$                                      |
| 48        | 1                    | $4.113 \times 10^{-5}$ | 1.390    | $5.456 \times 10^2$ | $2.176 \times 10^4$                        | 63.263                                                 | $2.067 \times 10^6$                                      |

**Table S6.** Summary of the best results of VO<sub>2</sub>, taking into consideration gold and VO<sub>2</sub> thicknesses, excitation wavelength, temperature, minimum reflectivity, FWHM, GH shift, and GH sensitivity for  $\Delta n = 0.02$ ,  $\Delta n = 1.2 \times 10^{-6}$ , and  $\Delta n = 1.2 \times 10^{-10}$ .

| Gold (nm) | VO <sub>2</sub> (nm) | λ (nm) | T (°C) | Reflectivity           | FWHM (°) | GH shift (μm)       | S <sub>GH</sub> (μm/RIU) $\Delta n = 0.02$ | S <sub>GH</sub> (°/RIU) $\Delta n = 1.2 \times 10^{-6}$ | S <sub>GH</sub> (μm/RIU) $\Delta n = 1 \times 10^{-10}$ |
|-----------|----------------------|--------|--------|------------------------|----------|---------------------|--------------------------------------------|---------------------------------------------------------|---------------------------------------------------------|
| 45        | 2                    | 950    | 20     | $1.737 \times 10^{-6}$ | 0.923    | $1.677 \times 10^3$ | $8.284 \times 10^4$                        | $4.849 \times 10^7$                                     | $5.084 \times 10^7$                                     |
| 46        | 4                    | 770    | 20     | $1.773 \times 10^{-8}$ | 2.195    | $1.752 \times 10^3$ | $8.762 \times 10^4$                        | $1.663 \times 10^8$                                     | $1.393 \times 10^8$                                     |
| 46        | 5                    | 710    | 20     | $1.396 \times 10^{-7}$ | 3.333    | $1.966 \times 10^3$ | $8.953 \times 10^4$                        | $7.263 \times 10^6$                                     | $8.025 \times 10^6$                                     |
| 47        | 1                    | 935    | 20     | $4.934 \times 10^{-6}$ | 0.848    | $1.275 \times 10^3$ | $5.054 \times 10^4$                        | $4.002 \times 10^7$                                     | $4.050 \times 10^7$                                     |
| 49        | 1                    | 735    | 95     | $1.048 \times 10^{-7}$ | 1.735    | $2.225 \times 10^3$ | $1.020 \times 10^5$                        | $1.668 \times 10^7$                                     | $1.917 \times 10^7$                                     |

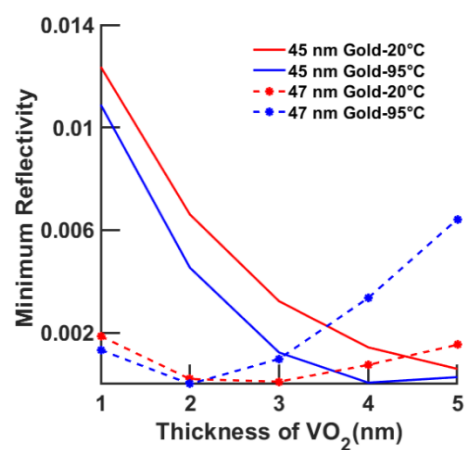

**Figure S2.** Minimum reflectivity versus thickness of VO<sub>2</sub> at 20 °C and 95 °C, for an excitation of 630 nm.

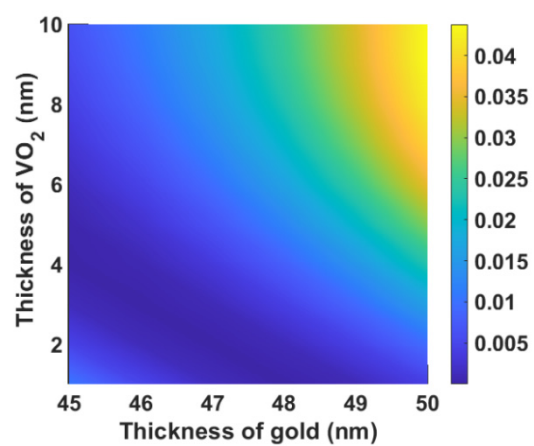

**Figure S3.** Minimum reflectivity in function of both gold and VO<sub>2</sub> thicknesses at 95 °C, for an excitation of 630 nm.

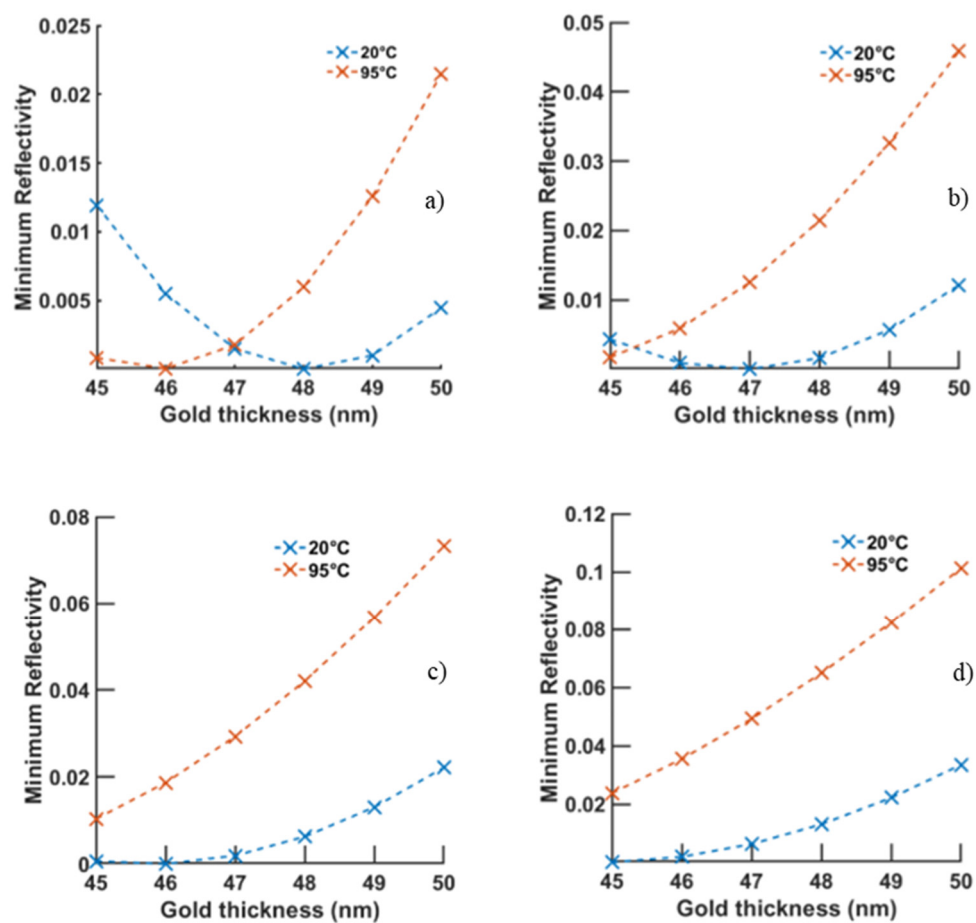

**Figure S4.** Minimum reflectivity versus thickness of gold, when VO<sub>2</sub> is at 20 °C and 95 °C and excited at 785 nm. Thickness of VO<sub>2</sub> is a) 2 nm, b) 3 nm, c) 4 nm, and d) 5 nm.

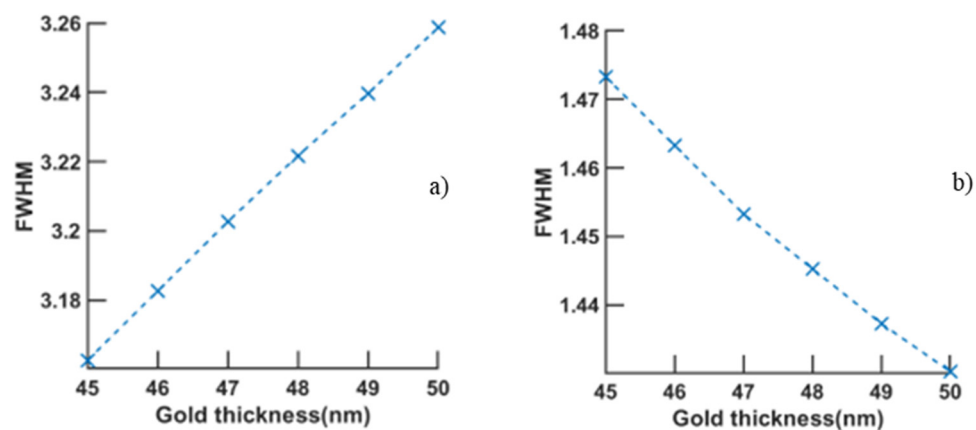

**Figure S5.** Width of the reflectivity curve versus gold thickness, when VO<sub>2</sub> is at 20 °C with a 1 nm thickness, for excitations of a) 630 nm and b) 785 nm.

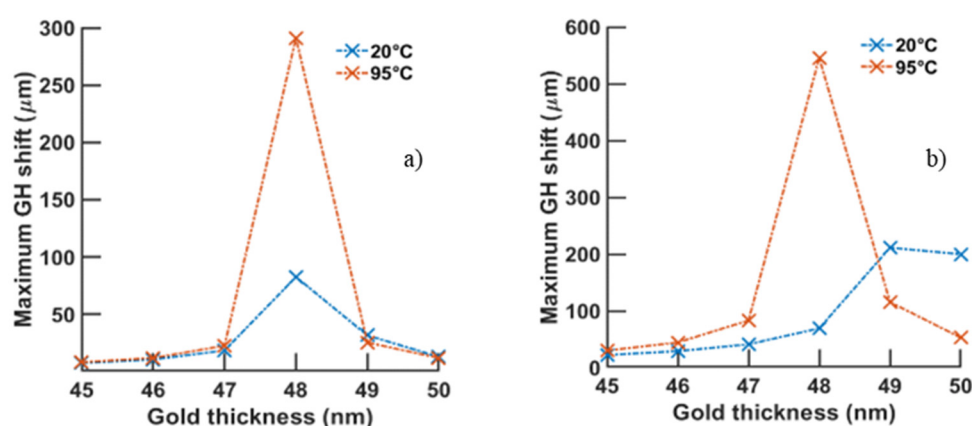

**Figure S6.** Maximum Goos-Hänchen shift versus gold thickness, for a thickness of VO<sub>2</sub> of 1 nm at 20 °C and 95 °C, for an excitation of a) 630 nm and b) 785 nm.

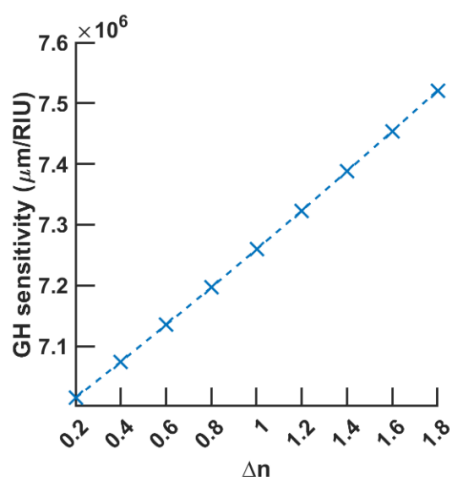

**Figure S7.** Maximum GH shift versus the change in  $\Delta n$  at 630 nm, with thicknesses of 47 nm and 2 nm of gold and VO<sub>2</sub>, respectively, and a temperature of 95 °C.

**Table S7.** Summary of the best results of VO<sub>2</sub>, while tuning the continuous and metasurface gold thickness, with an excitation of 630 nm, taking into consideration the temperature, periodicity, and width of the metasurface and thicknesses of continuous gold film, metasurface, and VO<sub>2</sub>, respectively, as well as minimum reflectivity, FWHM, GH shift, and GH sensitivity for  $\Delta n = 0.02$ ,  $\Delta n = 1.2 \times 10^{-6}$ , and  $\Delta n = 10^{-10}$ .

| T<br>(°C) | P<br>(nm) | w<br>(nm) | Cont<br>gold<br>(nm) | Meta-<br>surface<br>(nm) | VO <sub>2</sub><br>(nm) | R                      | FWHM  | GH<br>Shift<br>(mm) | S <sub>GH</sub><br>( $\mu\text{m}/\text{RIU}$ )<br>$\Delta n = 0.02$ | S <sub>GH</sub><br>( $\mu\text{m}/\text{RIU}$ )<br>$\Delta n = 1.2 \times 10^{-6}$ | S <sub>GH</sub><br>( $\mu\text{m}/\text{RIU}$ )<br>$\Delta n = 10^{-10}$ |
|-----------|-----------|-----------|----------------------|--------------------------|-------------------------|------------------------|-------|---------------------|----------------------------------------------------------------------|------------------------------------------------------------------------------------|--------------------------------------------------------------------------|
| 20        | 110       | 30        | 32                   | 18                       | 3                       | $3.650 \times 10^{-8}$ | 5.856 | 1.347               | $6.680 \times 10^4$                                                  | $1.471 \times 10^7$                                                                | $1.357 \times 10^7$                                                      |
| 20        | 150       | 20        | 28                   | 22                       | 1                       | $3.544 \times 10^{-7}$ | 3.833 | 1.305               | $6.410 \times 10^4$                                                  | $2.114 \times 10^6$                                                                | $1.652 \times 10^6$                                                      |
| 95        | 120       | 50        | 40                   | 10                       | 2                       | $6.997 \times 10^{-8}$ | 5.014 | 2.008               | $9.960 \times 10^4$                                                  | $5.102 \times 10^6$                                                                | $4.996 \times 10^6$                                                      |
| 95        | 140       | 50        | 28                   | 22                       | 4                       | $2.003 \times 10^{-8}$ | 6.644 | 1.898               | $9.430 \times 10^4$                                                  | $3.839 \times 10^6$                                                                | $3.788 \times 10^6$                                                      |
| 95        | 150       | 20        | 24                   | 26                       | 1                       | $2.413 \times 10^{-9}$ | 3.736 | 1.911               | $9.430 \times 10^4$                                                  | $8.541 \times 10^7$                                                                | $5.385 \times 10^7$                                                      |

**Table S8.** Summary of the best results obtained when the continuous gold and metasurface thicknesses are 30 nm and 20 nm, respectively, with VO<sub>2</sub> optimized at 20 °C, taking into consideration the thickness of VO<sub>2</sub> and excitation wavelength, periodicity, and width of the metasurface, as well as minimum reflectivity, FWHM, GH shift, GH sensitivity for  $\Delta n = 0.02$  and  $\Delta n = 10^{-10}$ , and angular sensitivity for  $\Delta n = 1.2 \times 10^{-6}$ .

| VO <sub>2</sub><br>(nm) | $\lambda$<br>(nm) | P<br>(nm) | w<br>(nm) | Reflectivity           | FWHM<br>(°) | GH shift<br>( $\mu\text{m}$ ) | S <sub>GH</sub><br>( $\mu\text{m}/\text{RIU}$ )<br>$\Delta n = 0.02$ | S <sub>A</sub><br>(°/RIU)<br>$\Delta n = 1.2 \times 10^{-6}$ | S <sub>GH</sub><br>( $\mu\text{m}/\text{RIU}$ )<br>$\Delta n = 1 \times 10^{-10}$ |
|-------------------------|-------------------|-----------|-----------|------------------------|-------------|-------------------------------|----------------------------------------------------------------------|--------------------------------------------------------------|-----------------------------------------------------------------------------------|
| 1                       | 980               | 130       | 40        | $5.197 \times 10^{-6}$ | 1.113       | $2.642 \times 10^3$           | $1.200 \times 10^5$                                                  | $4.472 \times 10^6$                                          | $3.655 \times 10^6$                                                               |
| 1                       | 1030              | 130       | 50        | $1.553 \times 10^{-6}$ | 1.095       | $2.822 \times 10^3$           | $1.280 \times 10^5$                                                  | $2.919 \times 10^7$                                          | $2.642 \times 10^7$                                                               |
| 1                       | 820               | 130       | 10        | $5.926 \times 10^{-7}$ | 1.367       | $2.595 \times 10^3$           | $1.240 \times 10^5$                                                  | $4.954 \times 10^6$                                          | $5.442 \times 10^6$                                                               |
| 1                       | 995               | 120       | 40        | $2.764 \times 10^{-6}$ | 1.110       | $2.684 \times 10^3$           | $1.230 \times 10^5$                                                  | $1.847 \times 10^7$                                          | $1.697 \times 10^7$                                                               |
| 2                       | 1000              | 110       | 50        | $1.613 \times 10^{-6}$ | 1.454       | $2.997 \times 10^3$           | $1.410 \times 10^5$                                                  | $5.764 \times 10^6$                                          | $5.111 \times 10^6$                                                               |

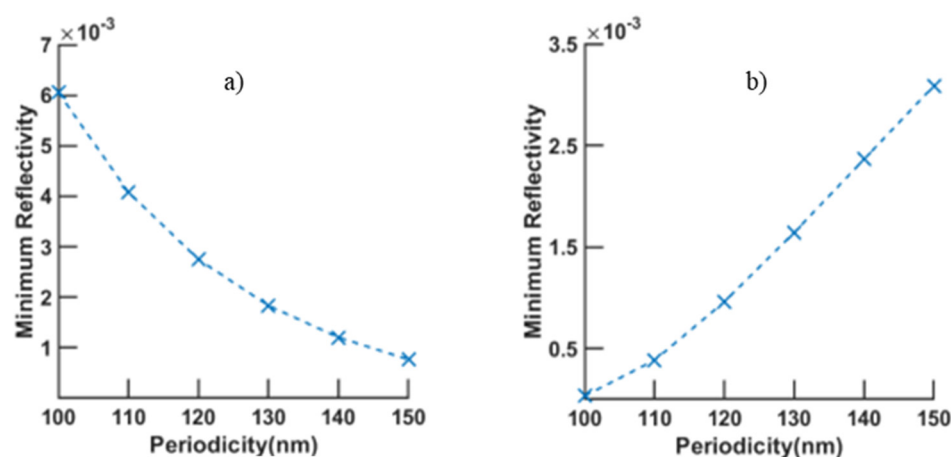

**Figure S8.** Minimum reflectivity versus periodicity, when the nanogroove's width equals 30 nm, with an excitation of 785 nm and VO<sub>2</sub> at 95 °C, and a) 1 nm and b) 2 nm.

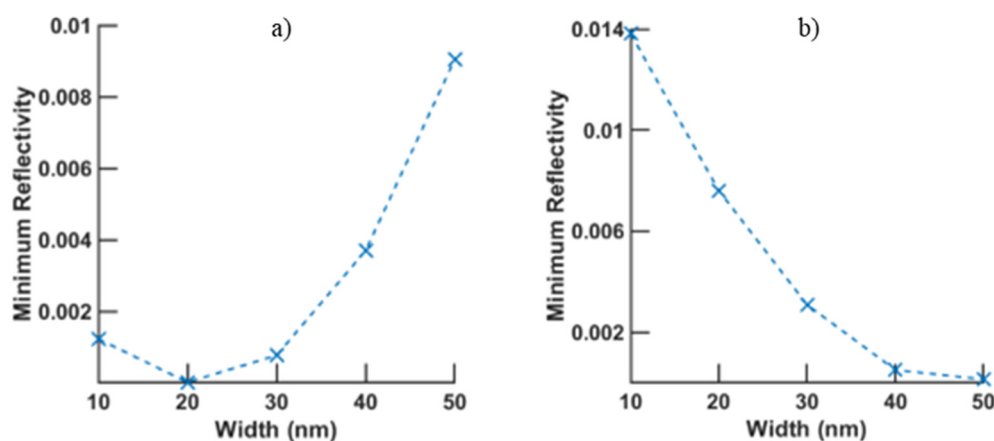

**Figure S9.** Minimum reflectivity versus width, when the nanogroove's periodicity equals 150 nm, with an excitation of 785 nm and VO<sub>2</sub> at 95 °C, and a) 1 nm, b) 2 nm.

### Formatting of Mathematical Components

The SPR sensor follows the famous Kretschmann configuration; therefore, the coupling medium is an equilateral SF11 glass prism, and its refractive index is denoted as  $n_1$ . Its dispersion relation is given by the following equation:

$$n_1^2 - 1 = \frac{1.89878101\lambda^2}{\lambda^2 - 155.23629} + \frac{1.73759695\lambda^2}{\lambda^2 - 0.013188707} + \frac{0.313747346\lambda^2}{\lambda^2 - 0.0623068142} \quad (S1)$$

Where  $\lambda$  is the laser wavelength used for excitation, which is given in  $\mu\text{m}$ . The relation given in (S1) is applicable only when the wavelength is in the range of 0.37 to 2.5  $\mu\text{m}$ . The following layer consists of a glass BK7 substrate with a thickness of 100 nm; its refractive index,  $n_2$ , is determined by the following dispersion relation:

$$n_2^2 - 1 = \frac{1.03961212\lambda^2}{\lambda^2 - 0.00600069867} + \frac{1.01046945\lambda^2}{\lambda^2 - 103.560653} + \frac{0.231792344\lambda^2}{\lambda^2 - 0.0200179144} \quad (S2)$$

Again,  $\lambda$  is the laser wavelength used for excitation, which is given in  $\mu\text{m}$ . (S2 is operational when the wavelength is in the range of 0.3 to 2.5  $\mu\text{m}$ , in which the transmittance is approximately 100%. The upcoming layer is the gold metal, and its refractive index,  $n_3$ , is taken from the Lorentz–Drude model. The final sensing layer is that of the change material, and its refractive index,  $n_4$ , is taken from experimental data.

To evaluate the efficiency of the sensor and quantify its performance, we used the well-known transfer matrix method (TMM) for a stratified medium, along with a Fresnel formulation.

$$M = \prod_{n=1}^{n=k-1} M_n = \begin{pmatrix} M_{11} & M_{12} \\ M_{21} & M_{22} \end{pmatrix} \quad (S3)$$

With:

$$M_{11} = M_{22} = \cos \beta_n \quad (S4)$$

$$M_{12} = -i \sin \beta_n / p_n \quad (S4)$$

$$M_{21} = p_n^2 M_{12} \quad (S5)$$

Where:

$$p_n = \frac{n_n^2 - n_1^2 \sin^2 \theta_1}{n_n^2} \quad (S6)$$

$$\beta_n = p_n (k_1 d_n) n_n^2 \quad (S7)$$

Given that:

- $N$  is the total number of layers, and  $n$  represents the index of the layer;
- $\theta_1$  is the incidence angle (with respect to  $z$ ) at the coupling medium, which is at the prism-glass substrate interface;
- $k$  is the incidence wavevector in the coupling medium, which is the prism-glass substrate interface:  $k_1 = \frac{2\pi}{\lambda_1}$ .

The surface plasmon waves are only excited through the transverse magnetic mode (TM, p mode) when the incidence wavevector matches that of the plasmons, whereas the s or TE electric mode serves as a reference signal:

$$k_{SPP} = \text{Re} \left[ k_0 \left( \frac{\epsilon_{PSM} n_s^2}{\epsilon_{PSM} + n_s^2} \right)^{1/2} \right] \quad (\text{S8})$$

where  $k_0$  is the incident wavevector, in rad/m,  $\epsilon_{PSM}$  is the permittivity of the phase change material, and  $n_s$  is the refractive index of the surrounding medium (water).

Given that, the reflection coefficient for the TM mode is set as:

$$r_{TM} = \frac{(M_{11} + M_{12}p_n)p_1 - (M_{21} + M_{22}p_n)}{(M_{11} + M_{12}p_n)p_1 + (M_{21} + M_{22}p_n)} \quad (\text{S9})$$

where the subscripts n and 1 denote the p coefficient for the first (prism) and nth layer, respectively. The reflectivity and phase are derived from

$$R_{TM} = |r_{TM}|^2 \quad (\text{S10})$$

$$\varphi_{TM} = \text{angle}(r_{TM}) \quad (\text{S11})$$

Accordingly, the GH shift is given as follows:

$$L_{GH} = -\frac{1}{k_1 n_1} \frac{d\varphi}{d\theta} \quad (\text{S12})$$

Along with minimum reflectivity and GH shift, FWHM and GH sensitivity are employed to evaluate the efficiency of the SPR sensor:

$$FWHM = \frac{1}{2}(\theta_{SPR} - \theta_{min}) \quad (\text{S13})$$

$$S_{GH} = \frac{\Delta L_{GH}}{\Delta n} \quad (\text{S14})$$

$$S_A = \frac{\Delta \theta}{\Delta n} \quad (\text{S15})$$

$$S_P = \frac{\Delta \varphi}{\Delta n} \quad (\text{S16})$$

where  $\theta_{SPR}$  and  $\theta_{min}$  are the angles of minimum reflectivity and minimum angle in the SPR curve, respectively,  $S_{GH}$ ,  $S_A$ , and  $S_P$  are the GH, angular, and phase sensitivity for a  $\Delta n$  change in  $\mu\text{m}/\text{RIU}$  and  $^\circ/\text{RIU}$ , respectively.

The effective medium theory (EMT) is employed to design the metasurface, consisting of a periodic arrangement of nanogrooves of width  $w$  and separated by  $P$ , which denotes the periodicity. The formulation used is known as the volume fraction approximation and can be employed for tuning the model by estimating the relative permittivity of a composite mixture. It shows accurate results when parameters  $P$  and  $w$  are in the deep subwavelength regime ( $P$  and  $w < \lambda/10$ ).

$$\epsilon_{//} = f\epsilon_{gold} + (1-f)\epsilon_d \quad (\text{S17})$$



$$\varepsilon_{\perp} = \frac{(1+f)\varepsilon_{gold}\varepsilon_d + (1-f)\varepsilon_d^2}{(1+f)\varepsilon_d + (1-f)\varepsilon_{gold}} \quad (\text{S18})$$

where  $f$  is the volume filling ratio that describes the percentage of occupation of each element of the composite material:

$$f = \frac{P-w}{P} \quad (\text{S20})$$

$\varepsilon_{//}$  and  $\varepsilon_{\perp}$  are the relative permittivities, parallel and perpendicular to the nanogrooves, respectively. In our simulation, we only used  $\varepsilon_{//}$ , as it has the greater influence in exciting the surface plasmons (parallel to the direction of free electron motion).
